# Supplementary material for: Side effects and acceptability measures for thermal ablation as a treatment for cervical precancer in low-income and middle-income countries: a systematic review and meta-synthesis
Source: HighWire-hosted journal article supplement (doi:10.1136/fmch-2021-001541), 2022-05-01
Supplement: fmch-2021-001541supp001_data_supplement.pdf [file fmch-2021-001541supp001_data_supplement.pdf]

**Supplementary Material**

Side effects and acceptability measures for thermal ablation as a treatment for cervical precancer in low- and middle-income countries: Systematic review and meta-synthesis

**Table of Contents**

Search Strategy

Figure S1: PRISMA diagram

Table S1: Reported side effects at the time of treatment and at follow-up in included studies in meta-synthesis

Table S2: Reported acceptability measures in included studies in meta-synthesis

References - Supplemental

**Search Strategy Example – Initial Ovid MEDLINE search in June 2020**

Database: Ovid MEDLINE(R) ALL &lt;1946 to June 29, 2020&gt;

Search Strategy:

- 
- 1 Uterine Cervical Neoplasms/ or Cervical Intraepithelial Neoplasia/ or Uterine Cervical Dysplasia/ (76613)
  - 2 (cervi\* adj4 lesion\*).mp. (11379)
  - 3 (cervi\* adj4 neoplas\*).mp. (79416)
  - 4 (cervi\* adj4 dysplasia).mp. (5271)
  - 5 (cervi\* adj4 carcinoma\*).mp. (24485)
  - 6 HPV.mp. or Papillomaviridae/ (49162)
  - 7 (papilloma\* adj4 virus\*).mp. (8733)
  - 8 (precancer\* adj4 lesion\*).mp. (6519)
  - 9 (CIN or CIN1 or CIN2 or CIN3 or CIN2+ or CIN2-3).mp. (11922)
  - 10 Papillomaviridae.mp. (24894)
  - 11 thermal ablat\*.mp. (3116)
  - 12 (electrocoagulat\* or electro coagulat\* or electro-coagulat\*).mp. (13259)
  - 13 (thermocoagulat\* or thermo coagulat\*).mp. (1101)
  - 14 cold coagulat\*.mp. (80)
  - 15 thermal coagulat\*.mp. (404)
  - 16 thermosurgery.mp. (9)
  - 17 (intraepithelial adj4 lesion\*).mp. (6449)
  - 18 semm\*.mp. (2051)
  - 19 (cervi\* adj4 (tumor\* or tumour\*)).mp. (6987)
  - 20 (cervi\* adj4 cancer\*).mp. (57885)
  - 21 (cervi\* adj4 (intraepithelial or intra-epithelial)).mp. (14548)
  - 22 (electrocauter\* or electro cauter\*).mp. (3720)
  - 23 (malignan\* adj4 cervi\*).mp. (2720)
  - 24 (cervi\* adj4 (precancer\* or pre cancer\*)).mp. (1866)
  - 25 papillomavirus.mp. (48136)
  - 26 (cervi\* adj4 cauter\*).mp. (28)
  - 27 1 or 2 or 3 or 4 or 5 or 6 or 7 or 8 or 9 or 10 or 17 or 19 or 20 or 21 or 23 or 24 or 25 (155334)
  - 28 11 or 12 or 13 or 14 or 15 or 16 or 18 or 22 or 26 (21494)
  - 29 27 and 28 (667)

**Figure S1: PRISMA diagram**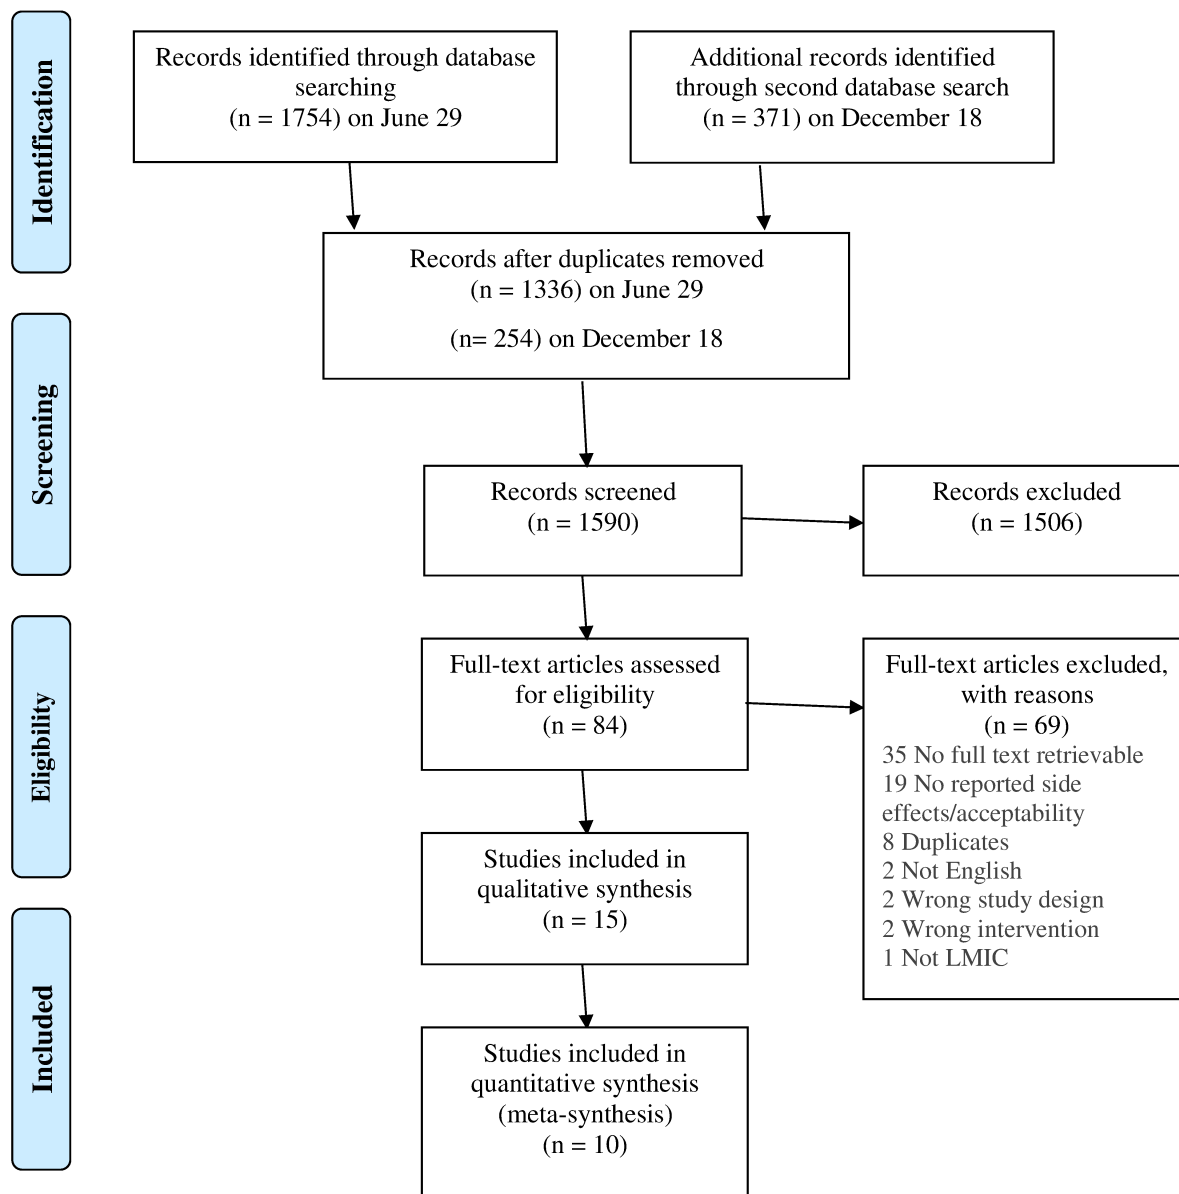

From: Moher D, Liberati A, Tetzlaff J, Altman DG, The PRISMA Group (2009). Preferred Reporting Items for Systematic Reviews and Meta-Analyses: The PRISMA Statement. PLoS Med 6(7): e1000097. doi:10.1371/journal.pmed1000097

For more information, visit [www.prisma-statement.org](http://www.prisma-statement.org).

**Table S1: Reported side effects at the time of treatment and at follow-up in included studies in meta-synthesis**

| Time period             | Measure reported            | Banerjee (2020) <sup>1</sup> | Chigbu (2020) <sup>2</sup> | Duan (2021) <sup>3</sup> | Joshi (2013) <sup>4</sup> | Mungo (2020) <sup>5</sup> | Naud (2016) <sup>6</sup> | Pinder (2020) <sup>7</sup> | Sandoval (2019) <sup>8</sup> | Viviano (2017) <sup>9</sup>         | Zhao (2021) <sup>10</sup> |
|-------------------------|-----------------------------|------------------------------|----------------------------|--------------------------|---------------------------|---------------------------|--------------------------|----------------------------|------------------------------|-------------------------------------|---------------------------|
|                         |                             | N=136                        | N=511                      | N=74                     | N=124                     | N=293                     | N=52                     | N=250                      | N=319                        | N=110                               | N=170                     |
| At time of treatment    | Any one or more side effect | 83 (61.0%)                   | 229 (44.8%)                | -                        | 33 (26.6%)                | -                         | -                        | 133 (53.2%)                | -                            | -                                   | -                         |
|                         | Pain (any)                  | 83 (61.0%)                   | -                          | 3.0 (+/- 2.4)**          | 31 (25.0%)                | 278 (94.9%)               | -                        | 133 (53.2%)                | 257 (80.6%)                  | 105 (95.5%)<br>Mean 3.0 (+/- 1.6)** | 95 (55.9%)                |
|                         | Mild pain                   | 131 (96.3%)                  | -                          | -                        | -                         | 231 (78.8%)               | -                        | 129 (51.6%)                | 168 (52.7%)                  | 72 (65.5%)<br>***                   | 90 (52.9%)                |
|                         | Moderate pain               | 3 (2.2%)                     | -                          | -                        | -                         | 42 (14.3%)                | -                        | 3 (1.2%)                   | 73 (22.9%)                   | 25 (22.7%)<br>***                   | -                         |
|                         | Severe pain                 | 2 (1.5%)                     | -                          | -                        | -                         | 5 (1.7%)                  | -                        | 1 (0.4%)                   | 16 (5.0%)                    | 4 (3.6%)<br>***                     | 5 (2.9%)                  |
|                         | Bleeding                    | 0 (0.0%)                     | 13 (2.5%)                  | 0 (0.0%)                 | 1 (0.8%)                  | -                         | -                        | -                          | 32 (10.0%)                   | -                                   | 3 (1.8%)                  |
| At treatment Follow-up* | Follow-up complete          | N=70                         | N=476                      | N=69                     | N=124                     | N=262                     | N=52                     | N=242                      | N=318                        | N=109                               | N=149                     |
|                         | Pain                        | -                            | 22 (4.6%)                  | -                        | 1 (0.8%)                  | 46 (17.6%)                | 41 (78.8%)               | 15 (6.2%)                  | 11 (3.5%)                    | 34 (31.2%)                          | 8 (5.4%)                  |

|  |                        |                                              |             |                       |                                             |                                                                             |                                                                                                                                                 |   |                                                                         |                                                                                                  |            |
|--|------------------------|----------------------------------------------|-------------|-----------------------|---------------------------------------------|-----------------------------------------------------------------------------|-------------------------------------------------------------------------------------------------------------------------------------------------|---|-------------------------------------------------------------------------|--------------------------------------------------------------------------------------------------|------------|
|  | Pain duration (d)      | -                                            | -           | -                     | -                                           | 7 [3-7]                                                                     | -                                                                                                                                               | - | 4                                                                       | 2.1 (+/- 4.8)                                                                                    | -          |
|  | Bleeding               | 0 (0.0%)                                     | -           | 54 (78.3%)            | -                                           | 99 (37.8%)                                                                  | 1 (1.9%)                                                                                                                                        | - | 31 (9.7%)                                                               | -                                                                                                | 49 (32.9%) |
|  | Bleeding duration (d)  | -                                            | -           | 10.6 (+/- 5.8)        | -                                           | 3.3 [2-3]                                                                   | -                                                                                                                                               | - | -                                                                       | -                                                                                                | 10         |
|  | Vaginal discharge      | -                                            | 194 (40.8%) | 69 (100%)             | 3 (2.4%)                                    | 258 (98.5%)                                                                 | -                                                                                                                                               | - | -                                                                       | 108 (99.1%)                                                                                      | 29 (19.5%) |
|  | Discharge duration (d) | -                                            | -           | 17.2 (+/- 6.9)        | -                                           | 14 [7-21]                                                                   | -                                                                                                                                               | - | -                                                                       | 16.2 (+/- 8.4)                                                                                   | 15         |
|  | Other as noted         | 0 (0.0%) vasovagal response during treatment | -           | No infection reported | 1 (0.8%) vasovagal response after treatment | 2 (0.8%) given antibiotics for foul-smelling vaginal discharge at follow-up | 1 (1.9%) vasovagal response and 1 (1.9%) case of pelvic inflammatory disease reported at 6 months after treatment not requiring hospitalization | - | 5 (1.6%) vasovagal response during treatment<br>0 (0.0%) reported fever | 100 (91.7%) appeared fully healed at follow-up exam;<br>3 (2.8%) reported infection at follow-up | -          |

\*see Table 2 for individual study follow-up details

\*\*measured through the visual analog scale

\*\*\*based on personal communication with author (Dr. Manuela Viviano, 2021)

**Table S2: Reported acceptability measures in included studies in meta-synthesis**

| Measure reported               | Banerjee (2020) <sup>1</sup> | Chigbu (2020) <sup>2</sup>                                                                         | Mungo (2020) <sup>5</sup>                                                                                           | Pinder (2020) <sup>7</sup> | Sandoval (2019) <sup>8</sup> |
|--------------------------------|------------------------------|----------------------------------------------------------------------------------------------------|---------------------------------------------------------------------------------------------------------------------|----------------------------|------------------------------|
| Satisfied with treatment       | 135/136*<br>(99.3%)          | 3.9/5**<br>(+/-1.3)                                                                                | 260/262**<br>(99.2%)                                                                                                | 248/250*<br>(99.2%)        | -                            |
| Recommends treatment to others | 136/136*<br>(100%)           | -                                                                                                  | 292/293*<br>(99.7%)                                                                                                 | 250/250***<br>(100%)       | 318/318**<br>(100%)          |
| Other as noted                 | -                            | 392/511*<br>(76.7%) rated experience better than expected;<br>35/511<br>(6.8%) worse than expected | 275/293*<br>(93.9%) rated experience better than expected;<br>18/293<br>(6.1%) rated experience worse than expected | -                          | -                            |

\*taken immediately after treatment

\*\*taken at follow-up

\*\*\*taken both immediately after treatment and at follow-up

### References - Supplemental

1. Banerjee D, Mandal R, Mandal A, et al. A Prospective Randomized Trial to Compare Safety, Acceptability and Efficacy of Thermal Ablation and Cryotherapy in a Screen and Treat Setting. *Asian Pac J Cancer Prev* 2020;21(5):1391-8.
2. Chigbu CO, Onwudiwe EN, Onyebuchi AK. Thermo-coagulation versus cryotherapy for treatment of cervical precancers: A prospective analytical study in a low-resource African setting. *J Obstet Gynaecol Res* 2020;46(1):147-52.
3. Duan L, Du H, Belinson JL, et al. Thermocoagulation versus cryotherapy for the treatment of cervical precancers. *J Obstet Gynaecol Res* 2021;47(1):279-86.
4. Joshi S, Sankaranarayanan R, Muwonge R, et al. Screening of cervical neoplasia in HIV-infected women in India. *Aids* 2013;27(4):607-15.
5. Mungo C, Osongo CO, Ambaka J, et al. Safety and Acceptability of Thermal Ablation for Treatment of Human Papillomavirus Among Women Living With HIV in Western Kenya. *JCO Glob Oncol* 2020;6:1024-33.
6. Naud PS, Muwonge R, Passos EP, et al. Efficacy, safety, and acceptability of thermocoagulation for treatment of cervical intraepithelial neoplasia in a hospital setting in Brazil. *Int J Gynaecol Obstet* 2016;133(3):351-4
7. Pinder LF, Parham GP, Basu P, et al. Thermal ablation versus cryotherapy or loop excision to treat women positive for cervical precancer on visual inspection with acetic acid test: pilot phase of a randomised controlled trial. *Lancet Oncol* 2020;21(1):175-84.
8. Sandoval M, Slavkovsky R, Bansil P, et al. Acceptability and safety of thermal ablation for the treatment of precancerous cervical lesions in Honduras. *Trop Med Int Health* 2019;24(12):1391-9.
9. Viviano M, Kenfack B, Catarino R, et al. Feasibility of thermocoagulation in a screen-and-treat approach for the treatment of cervical precancerous lesions in sub-Saharan Africa. *BMC Womens Health* 2017;17:2..
10. Zhao XL, Liu ZH, Zhao S, et al. Efficacy of point-of-care thermal ablation among high-risk human papillomavirus positive women in China. *Int J Cancer* 2021;148(6):1419-27.
